# Supplementary material for: Macrophage Profiling in Head and Neck Cancer to Improve Patient Prognosis and Assessment of Cancer Cell–Macrophage Interactions Using Three-Dimensional Coculture Models
Source: MDPI journal article supplement (doi:10.3390/ijms241612813), 2023-08-15
Supplement: s1 [file s1]

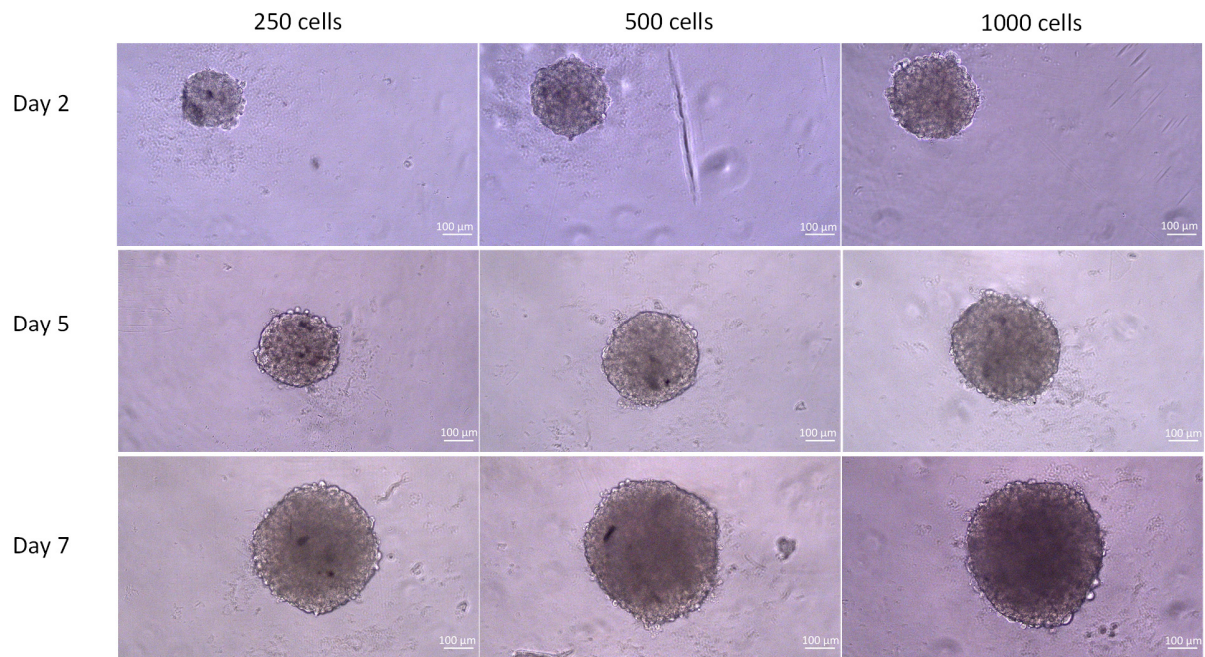

Figure S1: Visualization of spheroids growth according to the time and to the quantity of seeded cells.
